# Supplementary material for: Thermodynamic properties of sodium aluminosilicate hydrate (N–A–S–H)
Source: Royal Society of Chemistry journal article supplement (doi:10.1039/d1dt02202d), 2021-01-01
Supplement: d1dt02202d1.pdf [file d1dt02202d1.pdf]

**Supporting Information for:**

**Thermodynamic properties of sodium aluminosilicate hydrate (N-A-S-H)**

Brant Walkley<sup>1,2†</sup>, Xinyuan Ke<sup>1,3†</sup>, Oday Hussein<sup>1</sup>, John L. Provis<sup>1\*</sup>

<sup>1</sup>*Department of Materials Science and Engineering, The University of Sheffield, Sheffield S1 3JD, UK*

<sup>1</sup>*Department of Chemical and Biological Engineering, The University of Sheffield, Sheffield S1 3JD, UK*

<sup>3</sup>*Department of Architecture and Civil Engineering, University of Bath, Bath BA2 7AY, UK*

†These authors contributed equally to this work

\*Corresponding author: Email: [j.provis@sheffield.ac.uk](mailto:j.provis@sheffield.ac.uk)

## Appendix A - Quantification of the $^{29}\text{Si}$ MAS and $^1\text{H}$ - $^{29}\text{Si}$ CPMAS NMR data

**Table S1:** Relative integral area<sup>a</sup> for  $\text{Q}^4(m\text{Al})$  environments within N-A-S-H in each sample extracted from the deconvoluted  $^{29}\text{Si}$  MAS NMR spectra.

| Sample ID                   | <i>N-A-S-H sites</i> |                      |                      |                      |                      | <i>Precursor sites</i> |                      |                      |                      |                      | N-A-S-H total | Precursor total | Si/Al <sup>b</sup> |
|-----------------------------|----------------------|----------------------|----------------------|----------------------|----------------------|------------------------|----------------------|----------------------|----------------------|----------------------|---------------|-----------------|--------------------|
|                             | Q <sup>4</sup> (4Al) | Q <sup>4</sup> (3Al) | Q <sup>4</sup> (2Al) | Q <sup>4</sup> (1Al) | Q <sup>4</sup> (0Al) | Q <sup>4</sup> (4Al)   | Q <sup>4</sup> (3Al) | Q <sup>4</sup> (2Al) | Q <sup>4</sup> (1Al) | Q <sup>4</sup> (0Al) |               |                 |                    |
| <i>As cured</i>             |                      |                      |                      |                      |                      |                        |                      |                      |                      |                      |               |                 |                    |
| NASH-1                      | 24                   | 12                   | 4                    | 0                    | 0                    | 15                     | 22                   | 15                   | 6                    | 1                    | 40            | 60              | 1.15               |
| NASH-1.5                    | 50                   | 26                   | 9                    | 0                    | 0                    | 1                      | 12                   | 3                    | 0                    | 0                    | 85            | 15              | 1.15               |
| NASH-2                      | 28                   | 13                   | 8                    | 3                    | 1                    | 1                      | 12                   | 13                   | 7                    | 14                   | 54            | 46              | 1.25               |
| GP-1                        | 58                   | 25                   | 9                    | 0                    | 0                    | 0                      | 0                    | 1                    | 2                    | 5                    | 92            | 8               | 1.13               |
| GP-1.5                      | 35                   | 33                   | 18                   | 5                    | 0                    | 0                      | 0                    | 1                    | 3                    | 6                    | 90            | 10              | 1.30               |
| <i>Dissolution</i>          |                      |                      |                      |                      |                      |                        |                      |                      |                      |                      |               |                 |                    |
| NASH-1                      | 27                   | 14                   | 5                    | 0                    | 0                    | 13                     | 20                   | 14                   | 4                    | 1                    | 47            | 53              | 1.15               |
| NASH-1.5                    | 34                   | 17                   | 6                    | 0                    | 0                    | 2                      | 17                   | 15                   | 9                    | 0                    | 58            | 42              | 1.15               |
| NASH-2                      | 28                   | 13                   | 8                    | 3                    | 1                    | 3                      | 10                   | 13                   | 8                    | 12                   | 54            | 46              | 1.25               |
| GP-1                        | 50                   | 22                   | 8                    | 0                    | 0                    | 0                      | 10                   | 5                    | 2                    | 4                    | 79            | 21              | 1.13               |
| GP-1.5                      | 36                   | 33                   | 18                   | 5                    | 0                    | 0                      | 0                    | 1                    | 2                    | 5                    | 92            | 8               | 1.30               |
| <i>Precursor difference</i> |                      |                      |                      |                      |                      |                        |                      |                      |                      |                      |               |                 |                    |
| NASH-1                      | -                    | -                    | -                    | -                    | -                    | -1                     | -2                   | -2                   | -2                   | 0                    | -1            | -7              | -                  |
| NASH-1.5                    | -                    | -                    | -                    | -                    | -                    | 1                      | 5                    | 12                   | 9                    | 0                    | -             | 27              | -                  |
| NASH-2                      | -                    | -                    | -                    | -                    | -                    | 2                      | -2                   | 0                    | 1                    | -1                   | -             | 0               | -                  |
| GP-1                        | -                    | -                    | -                    | -                    | -                    | 0                      | 9                    | 4                    | 0                    | -1                   | -             | 13              | -                  |
| GP-1.5                      | -                    | -                    | -                    | -                    | -                    | 0                      | 0                    | 0                    | -1                   | -1                   | -             | -2              | -                  |

<sup>a</sup> The relative integrated intensity for each resonance is normalised to the sum of all sites within the reaction product and is obtained by simulating the  $^{29}\text{Si}$  MAS NMR spectra. Estimated error in the relative integral area is 1%. <sup>b</sup> The Si/Al of the N-A-S-H gel is calculated using Engelhardt's formula<sup>39</sup> and the relative integral areas of the  $\text{Q}^4(m\text{Al})$  resonances.

## Appendix B – Thermodynamic data for the sodium alkali aluminosilicate gels

**Table S2:** The ionic coefficients, ionic activities and total ionic strength of ionic species calculated according to Eq. 1 to Eq. 3, using the experimentally measured concentration shown in Figure 8 as input. The only ionic species allowed to form in these systems are: Na<sup>+</sup>, AlO<sub>2</sub><sup>-</sup>, SiO<sub>2</sub>@, OH<sup>-</sup>, including trace of K<sup>+</sup>.

| Sample ID    | Ionic coefficient (γ) |                               |                    |                 |                | Ionic activity mmol/L |                               |                    |                 |                | Total ionic strength (mol/kg-H <sub>2</sub> O) |
|--------------|-----------------------|-------------------------------|--------------------|-----------------|----------------|-----------------------|-------------------------------|--------------------|-----------------|----------------|------------------------------------------------|
|              | Na <sup>+</sup>       | AlO <sub>2</sub> <sup>-</sup> | SiO <sub>2</sub> @ | OH <sup>-</sup> | K <sup>+</sup> | Na <sup>+</sup>       | AlO <sub>2</sub> <sup>-</sup> | SiO <sub>2</sub> @ | OH <sup>-</sup> | K <sup>+</sup> |                                                |
| NASH-1-1d    | 0.9362                | 0.9362                        | 1.0008             | 0.9362          | 0.9362         | 5.1584                | 1.2075                        | 0.3431             | 0.3243          | 0.1434         | 0.0036                                         |
| NASH-1-3d    | 0.9344                | 0.9344                        | 1.0009             | 0.9344          | 0.9344         | 5.3791                | 1.4533                        | 0.4550             | 0.3117          | 0.1236         | 0.0039                                         |
| NASH-1-7d    | 0.9306                | 0.9306                        | 1.0010             | 0.9306          | 0.9306         | 6.1049                | 1.7556                        | 0.5429             | 0.2649          | 0.0750         | 0.0044                                         |
| NASH-1-14d   | 0.9295                | 0.9295                        | 1.0010             | 0.9295          | 0.9295         | 6.2236                | 1.9314                        | 0.5602             | 0.2587          | 0.0908         | 0.0046                                         |
| NASH-1-28d   | 0.9274                | 0.9274                        | 1.0011             | 0.9274          | 0.9274         | 6.7255                | 2.0554                        | 0.5219             | 0.1940          | 0.0795         | 0.0049                                         |
| NASH-1-90d   | 0.9294                | 0.9294                        | 1.0010             | 0.9294          | 0.9294         | 6.9922                | 1.4157                        | 0.1744             | 0.1073          | 0.0149         | 0.0046                                         |
| NASH-1.5-1d  | 0.9174                | 0.9174                        | 1.0015             | 0.9174          | 0.9174         | 8.7836                | 0.1777                        | 2.0526             | 2.9280          | 0.1616         | 0.0066                                         |
| NASH-1.5-3d  | 0.9177                | 0.9177                        | 1.0015             | 0.9177          | 0.9177         | 9.5351                | 0.2011                        | 3.2873             | 2.0909          | 0.1133         | 0.0065                                         |
| NASH-1.5-7d  | 0.9147                | 0.9147                        | 1.0016             | 0.9147          | 0.9147         | 10.6564               | 0.2433                        | 4.4546             | 1.8297          | 0.2119         | 0.0071                                         |
| NASH-1.5-14d | 0.9161                | 0.9161                        | 1.0015             | 0.9161          | 0.9161         | 10.6613               | 0.1567                        | 4.8502             | 1.5249          | 0.1322         | 0.0068                                         |
| NASH-1.5-28d | 0.9144                | 0.9144                        | 1.0016             | 0.9144          | 0.9144         | 11.2633               | 0.1279                        | 5.1476             | 1.5575          | 0.0841         | 0.0071                                         |
| NASH-1.5-90d | 0.9134                | 0.9134                        | 1.0017             | 0.9134          | 0.9134         | 10.8329               | 0.0522                        | 4.9622             | 2.4819          | 0.0253         | 0.0073                                         |
| NASH-2-1d    | 0.9240                | 0.9240                        | 1.0012             | 0.9240          | 0.9240         | 8.9269                | 0.0236                        | 3.6069             | 0.7055          | 0.3566         | 0.0054                                         |
| NASH-2-3d    | 0.9229                | 0.9229                        | 1.0013             | 0.9229          | 0.9229         | 9.3946                | 0.0162                        | 5.0221             | 0.6382          | 0.3026         | 0.0056                                         |
| NASH-2-7d    | 0.9218                | 0.9218                        | 1.0013             | 0.9218          | 0.9218         | 9.7251                | 0.0220                        | 5.6285             | 0.4996          | 0.4308         | 0.0058                                         |
| NASH-2-14d   | 0.9215                | 0.9215                        | 1.0013             | 0.9215          | 0.9215         | 10.0977               | 0.0181                        | 5.8264             | 0.4068          | 0.2423         | 0.0058                                         |
| NASH-2-28d   | 0.9193                | 0.9193                        | 1.0014             | 0.9193          | 0.9193         | 10.6641               | 0.0137                        | 5.5795             | 0.3258          | 0.4447         | 0.0062                                         |
| NASH-2-90d   | 0.9210                | 0.9210                        | 1.0013             | 0.9210          | 0.9210         | 10.2176               | 0.0068                        | 5.3936             | 0.6369          | 0.0514         | 0.0059                                         |
| GP1-1        | 0.9641                | 0.9641                        | 1.0002             | 0.9641          | 0.9641         | 1.2864                | 0.0753                        | 0.0666             | 0.6273          | 0.0243         | 0.0010                                         |
| GP1-3        | 0.9460                | 0.9460                        | 1.0006             | 0.9460          | 0.9460         | 3.4510                | 0.6872                        | 0.9642             | 0.6108          | 0.0316         | 0.0025                                         |
| GP1-7        | 0.9462                | 0.9462                        | 1.0006             | 0.9462          | 0.9462         | 3.7992                | 0.6537                        | 0.8503             | 0.2149          | 0.0637         | 0.0025                                         |
| GP1-14       | 0.9397                | 0.9397                        | 1.0007             | 0.9397          | 0.9397         | 4.0980                | 0.9055                        | 1.1176             | 0.9812          | 0.0643         | 0.0032                                         |
| GP1-28       | 0.9421                | 0.9421                        | 1.0007             | 0.9421          | 0.9421         | 3.9687                | 1.0498                        | 1.1386             | 0.5067          | 0.0247         | 0.0029                                         |
| GP1-90       | 0.9376                | 0.9376                        | 1.0008             | 0.9376          | 0.9376         | 5.1315                | 0.8359                        | 0.5911             | 0.5044          | 0.0361         | 0.0035                                         |
| GP1.5-1      | 0.9480                | 0.9480                        | 1.0005             | 0.9480          | 0.9480         | 3.0672                | 0.3230                        | 0.7256             | 1.0050          | 0.0156         | 0.0023                                         |
| GP1.5-3      | 0.9426                | 0.9426                        | 1.0006             | 0.9426          | 0.9426         | 3.7730                | 0.4414                        | 1.0174             | 1.1914          | 0.0322         | 0.0029                                         |
| GP1.5-7      | 0.9414                | 0.9414                        | 1.0007             | 0.9414          | 0.9414         | 4.0240                | 0.5152                        | 1.2016             | 1.0773          | 0.0727         | 0.0030                                         |
| GP1.5-14     | 0.9411                | 0.9411                        | 1.0007             | 0.9411          | 0.9411         | 4.0459                | 0.6732                        | 1.4291             | 0.9826          | 0.0546         | 0.0031                                         |
| GP1.5-28     | 0.9448                | 0.9448                        | 1.0006             | 0.9448          | 0.9448         | 4.4356                | 0.5127                        | 0.9061             | 0.0165          | 0.0326         | 0.0026                                         |
| GP1.5-90     | 0.9390                | 0.9390                        | 1.0007             | 0.9390          | 0.9390         | 5.6380                | 0.5152                        | 0.8076             | 0.0164          | 0.0280         | 0.0033                                         |
